# Supplementary material
Source: PubMed Central journal article supplement (PMC4046804)
Supplement: sb400053b_si_001.pdf [file sb400053b_si_001.pdf]

# A genetically-encoded sender-receiver system in 3D mammalian cell culture

## Supplementary Information S1.

This file contains Supplementary Figures S1-S5, annotated DNA sequences of the final constructs used in this study and the computational model of diffusion and repression.

### Contents

#### 1. Supplementary figures:

**Figure S1.** Comparison of lipofectamine and bead-based localised transfection of MDCK cells in standard 2D cell culture.

**Figure S2.** HGF induction of MDCK:pMMP-1-d2EGFP stable cell line in 2D culture.

**Figure S3.** Time course of repression of HGF by NK4.

**Figure S4.** Secretion of HGF and NK4 from MDCK cells grown in monolayer.

**Figure S5.** Quantification of the gradient of HGF-induced GFP.

#### 2. Legends for supporting Quicktime movie files.

#### 3. pMMP-1-d2EGFP DNA sequence

#### 4. pCMV-HGF-IRES-DsRed DNA sequence

#### 5. pCMV-NK4-IRES-DsRed DNA sequence

#### 6. Calculation of effective diffusion constants

#### 7. Regulatory function calculation - HGF and NK4

## 1. Supplementary figures:

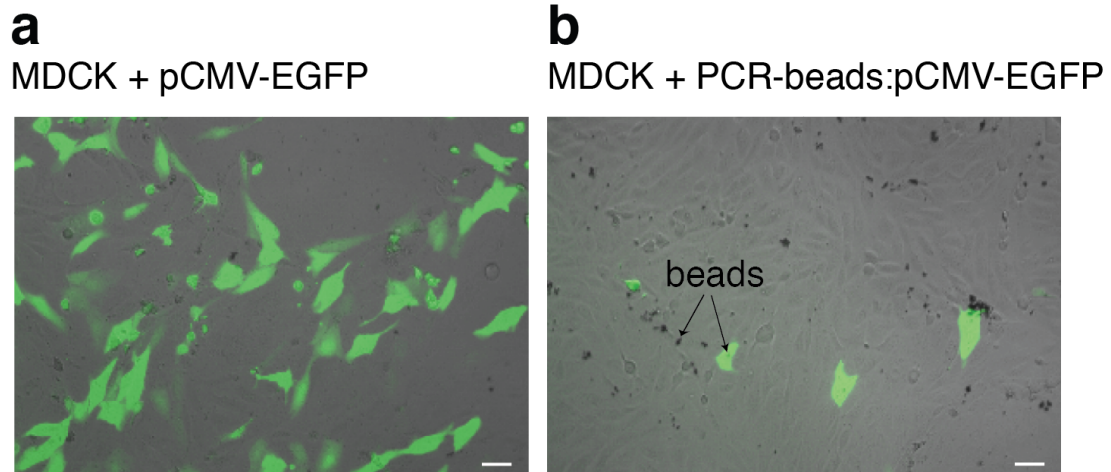

**Figure S1. Comparison of lipofectamine and bead-based localised transfection of MDCK cells in standard 2D cell culture.** Fluorescence microscopy images are of cells transfected with pCMV-EGFP. (a) About ~60% transfection efficiency is achievable with standard lipofectamine plasmid transient transfection. (b) Using a bead-based localized PCR transfection method (*Nat Methods* **2005**, 2 (2), 113-8), less than 1% of MDCK cells are transfected. Green cells are transfected by streptavidin-coated paramagnetic beads, coated with biotinylated PCR DNA. Scale bars, 50  $\mu\text{m}$ .

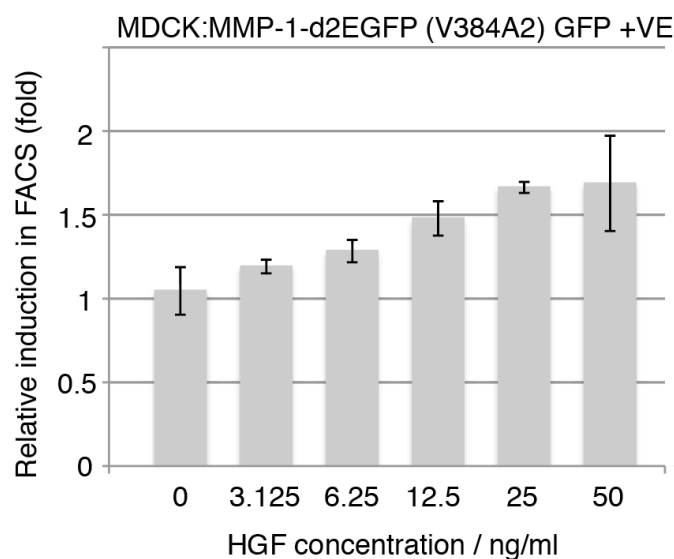

**Figure S2. HGF induction of MDCK:pMMP-1-d2EGFP stable cell line in 2D culture.** Analytical FACS was used to count GFP positive cells in samples treated with different concentrations of HGF for 24 h. The same gate is used in all experiments defined by a FITC/PE-A dotplot, such that there are 0% WT MDCK cells and 99.9% of MMP1-d2EGFP transfected cells (V384A2 candidate) in this gate. The geometric mean of FITC (EGFP) was extracted. To obtain fold changes, each individual triplicate repeat was normalised for the geometric mean of the 0 HGF sample. Error bars: 1 s.d.

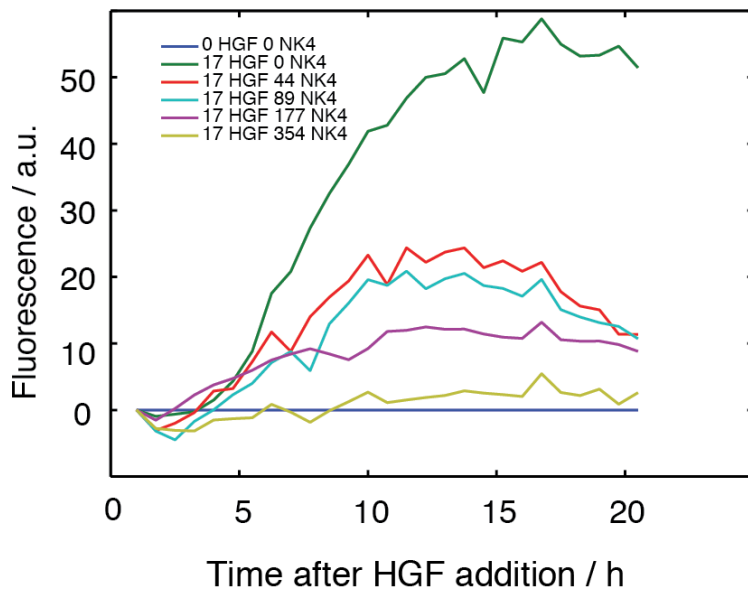

**Figure S3. Time course of repression of HGF by NK4.** Different concentrations of HGF and NK4 were added at time zero, as indicated. Fluorescence was followed by quating microscopy images as described in Methods.

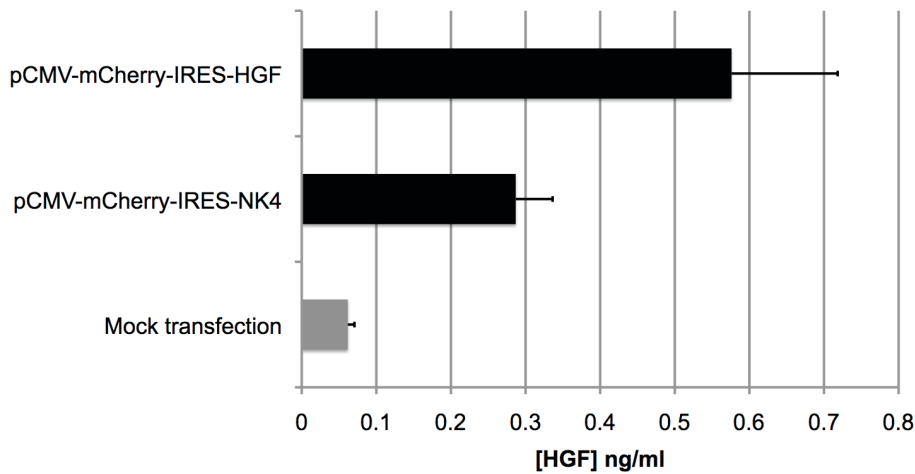

**Figure S4. Secretion of HGF and NK4 from MDCK cells grown in monolayer.** MDCK cells were transfected with plasmids encoding HGF or NK4 secretion constructs. The secreted protein in the medium was measured by ELISA, 24 hrs after transfection, with a Quantikine Human HGF Immunoassay Kit (R&D Systems DHG00). Expression is up to ~0.5 ng/ml (~0.01 nM).

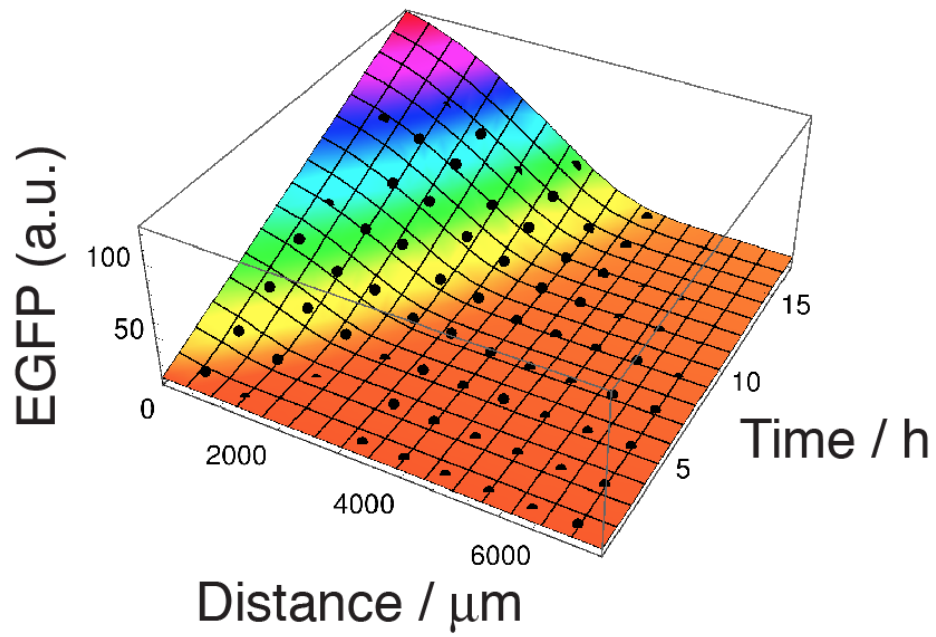

**Figure S5. Quantification of the gradient of HGF-induced GFP.** Black dots are from time-lapse experimental data as in Fig. 6a. The color axis surface profile corresponds to the diffusion profile predicted by Eq. (7), with a diffusion coefficient  $D_a = 3.1 \times 10^{-3} \text{ mm}^2/\text{min}$ . No delay in response has been considered.

## **2. Legends for supporting Quicktime movie files.**

**Supplementary Movie S1.** This movie shows a cyst of the MDCK-MMP-1-d2-EGFP stable cell line, responding to 10 ng/ml HGF over a period of 16 hours, by inducing green fluorescence and tubulating.

**Supplementary Movie S2.** This movie shows a cyst of the MDCK-MMP-1-d2-EGFP stable cell line, locally transfected with pCMV-mCherry-IRES-HGF (red region). Over a period of 16 hours, the neighbouring cells respond to secreted HGF by inducing green fluorescence and tubulating.

**Supplementary Movie S3.** This movie shows another cyst of the MDCK-MMP-1-d2-EGFP stable cell line, locally transfected with pCMV-mCherry-IRES-HGF (red region). Over a period of 16 hours, the neighbouring cells respond to secreted HGF by inducing green fluorescence and tubulating.

### 3. pMMP-1-d2EGFP

The pMMP1-d2EGFP plasmid with neomycin resistance, used for the establishment of the MDCK-MMP1-d2EGFP stable cell line, was constructed by PCR and restriction enzyme cloning to give the following sequence, which was verified by Sanger sequencing.

| Key                                     | Position (bp) |
|-----------------------------------------|---------------|
| <u>NheI</u> restriction site (GCTAGC)   | 1 – 6         |
| Human MMP-1 promoter (bp -512 to +63)   | 7 – 581       |
| <u>BspEI</u> restriction site (TCCGGA)  | 582 – 586     |
| d2EGFP CDS (HindIII-d2 PEST sequence)   | 587 – 1432    |
| <u>FseI</u> restriction site (GGCCGGCC) | 1447 – 1454   |
| Poly A signal                           | 1599 – 1649   |
| Kanamycin/Neomycin resistance CDS       | 2676 – 3470   |

```

1  GCTAGCgctt aacaaaggca gaaggggaacc tcagagaacc ccgaagagcc accgtaaagt
61  gagtgcctggg ggagctgaac ttcagtcagt acaggagccg aacagccatc aggtgcgcag
121 tgttagtaat tccaccctct gccctgggag caaggtgtgt ggagaaacct gtagcacttt
181 atgaccatca gaaccagcct ttttcaaaaa gaccatggag tactctttga cctgtgtata
241 taacaagaac ctttctcaaa taggaaagaa atgaattgga gaaaaccact gtttacatgg
301 cagagtgtgt ctcccttcgca cacatcttgt ttgaagttaa tcatgacatt gcaacaccaa
361 gtgattccaa ataactgtct aggagtcaac atttctaagt attgcctagt ctattcatag
421 ctaatcaaga GGATggtata aagcatgagt cagacacctc tggctttctg gaaggcaag
481 gactctatat atacagaggg agcttcctag ctgggatatt ggagcagcaa gaggctggga
541 agccatcact taccttgcac tgagaaagaa gacaaaggcc aTCCGGATGG TGAGCAAGGG
601 CGAGGAGCTG TTCACCGGGG TGGTGCCCAT CCTGGTCGAG CTGGACGGCG ACGTAAACGG
661 CCACAAGTTC AGCGTGTCCG GCGAGGGCGA GGGCGATGCC ACCTACGGCA AGCTGACCCT
721 GAAGTTCATC TGCACCACCG GCAAGCTGCC CGTGCCCTGG CCCACCCTCG TGACCACCCT
781 GACCTACGGC GTGCAGTGCT TCAGCCGCTA CCCCAGCCAC ATGAAGCAGC ACGACTTCTT
841 CAAGTCCGCG ATGCCCGAAG GCTACGTCCA GGAGCGCACC ATCTTCTTCA AGGACGACGG
901 CAACTACAAG ACCCGCGCCG AGGTGAAGTT CGAGGGCGAC ACCCTGGTGA ACCGCATCGA
961 GCTGAAGGGC ATCGACTTCA AGGAGGACGG CAACATCCTG GGGCACAAGC TGGAGTACAA
1021 CTACAACAGC CACAACGTCT ATATCATGGC CGACAAGCAG AAGAACGGCA TCAAGGTGAA
1081 TTTCAAGATC CGCCACAACA TCGAGGACGG CAGCGTGCAG CTCGCCGACC ACTACCAGCA
1141 GAACACCCCC ATCGGCGACG GCCCCGTGCT GCTGCCCGAC AACCCTACC TGAGCACCCA
1201 GTCCGCCCTG AGCAAAGACC CCAACGAGAA GCGCGATCAC ATGGTCTGCG TGGAGTTCGT
1261 GACCGCCGCC GGGATCACTC TCGGCATGGA CGAGCTGTAC AAGAAGCTTA GCCATGGCTT
1321 CCCGCCGGAG GTGGAGGAGC AGGATGATGG CACGCTGCCC ATGTCTTGTG CCCAGGAGAG
1381 CGGGATGGAC CGTCACCCTG CAGCCTGTGC TTCTGCTAGG ATCAATGTGT AGTCTAGAGT
1441 CGGGGCGGCC GGccGACTCT AGATCATAAT CAGCCATACC ACATTTGTAG AGGTTTACT
1501 TGCTTAAAAA AACCTCCAC ACCTCCCCT GAACCTGAAA CATAAATGA ATGCAATTGT
1561 TGTGTAAAC TTGTTTATTG CAGCTTATAA TGGTTACAAA TAAAGCAATA GCATCACAAA
1621 TTTCAAAAT AAAGCATTFT TTCACTGCA TTCTAGTGTG GGTGTGTTCA AACTCATCAA
1681 TGTATCTTAA GCGTAAATTT GTAAGCGTTA ATATTTTGTT AAAATTCGCG TTAATTTTTT
1741 GTTAAATCAG CTCATTTTTT AACCAATAGG CCGAAATCGG CAAAATCCCT TATAAATCAA
1801 AAGAATAGAC CGAGATAGGG TTGAGTGTG TTCCAGTTG GAACAAGAGT CCACTATTAA
1861 AGAACGTGGA CTCCAACGTC AAAGGGCGAA AAACCGCTA TCAGGGCGAT GGCCCACTAC
1921 GTGAACCATC ACCCTAATCA AGTTTTTTGG GGTGAGGTG CCGTAAAGCA CTAAATCGGA
1981 ACCCTAAAGG GAGCCCCGA TTTAGAGCTT GACGGGGAAA GCCGGCGAAC GTGGCGAGAA
2041 AGGAAGGGAA GAAAGCGAAA GGAGCGGGCG CTAGGGCGCT GGCAAGTGTA GCGGTCACGC
2101 TGCCGCTAAC CACCACACCC GCCGCGCTTA ATGCGCCGCT ACAGGGCGCG TCAGGTGGCA
2161 CTTTTCCGGG AATGTGCGC GGAACCCCTA TTTGTTTATT TTTCTAATA CATTCAAATA
2221 TGTATCCGCT CATGAGACAA TAACCCCTGAT AAATGCTTCA ATAATATTGA AAAAGGAAGA
2281 GTCTGAGGC GGAAGAACC AGCTGTGGA TGTGTGTGAG TTAGGGTGTG GAAAGTCCCC
2341 AGGTCCCCA GCAGGCAGAA GTATGCAAAG CATGCATCTC AATTAGTCAG CAACCAGTGC
2401 TGGAAAGTCC CCAGGCTCCC CAGCAGGCAG AAGTATGCAA AGCATGCATC TCAATTAGTG
2461 AGCAACCATA GTCCCGCCCC TAACTCCGCC CATCCCGCCC CTAATCCGCG CCAGTTCGGC

```

```

2521 CCATFCTCCG CCCCATGGCT GACTAATTTT TTTTATTTAT GCAGAGGCCG AGGCCGCCTC
2581 GGCCTCTGAG CTATTCCAGA AGTAGTGAGG AGGCTTTTTT GGAGGCCTAG GCTTTTGCAA
2641 AGATCGATCA AGAGACAGGA TGAGGATCGT TTCGCATGAT TGAACAAGAT GGATTGCACG
2701 CAGGTTCTCC GGCCGCTTGG GTGGAGAGGC TATTCCGGTA TGAAGGGCA CAACAGACAA
2761 TCGGCTGCTC TGATGCCGCC GTGTTCCGGC TGTGAGCGCA GGGGCGCCCG GTTCTTTTTG
2821 TCAAGACCGA CCTGTCCGGT GCCCTGAATG AACTGCAAGA CGAGGCAGCG CGGCTATCGT
2881 GGCTGGCCAC GACGGGCGTT CCTTGCGCAG CTGTGCTCGA CGTTGTCACT GAAGCGGAA
2941 GGGACTGGCT GCTATTGGGC GAAGTGCCGG GGCAGGATCT CCTGTCACT CACCTTGCTC
3001 CTGCCGAGAA AGTATCCATC ATGGCTGATG CAATGCGGCG GCTGCATACG CTTGATCCGG
3061 CTACCTGCC ATTCGACCAC CAAGCGAAAC ATCGCATCGA GCGAGCACGT ACTCGGATGG
3121 AAGCCGGTCT TGTCGATCAG GATGATCTGG ACGAAGAGCA TCAGGGGCTC GCGCCAGCCG
3181 AACTGTTCCG CAGGCTCAAG GCGAGCATGC CCGACGGCGA GGATCTCGTC GTGACCCATG
3241 GCGATGCCTG CTTGCCGAAT ATCATGGTGG AAAATGGCCG CTTTTCTGGA TTCATCGACT
3301 GTGGCCGGCT GGGTGTGGCG GACCGCTATC AGGACATAGC GTTGGCTACC CGTGATATTG
3361 CTGAAGAGCT TGGCGCGGAA TGGGCTGACC GCTTCCCTG GCTTTACGGT ATCGCCGCTC
3421 CCGATTCGCA GCGCATCGCC TTCTATCGCC TTCTTGACGA GTTCTTCTGA

```

#### 4. pCMV-HGF-IRES-DsRed

The CMV-HGF-IRES-DsRed plasmid was constructed by standard cloning methods, was verified by DNA sequencing, and contains the following features.

| Key                                 | Position (bp) |
|-------------------------------------|---------------|
| CMV promoter                        | 1 – 589       |
| SacI restriction site               | 616 – 621     |
| HGF CDS with Kozak sequence         | 621 – 2814    |
| XmaI restriction site               | 2825-2820     |
| BamHI restriction site              | 2819-2824     |
| IRES (internal ribosome entry site) | 2825-3409     |
| BspEI restriction site              | 3140-3415     |
| DsRed CDS with Kozak sequence       | 3415-4096     |
| NotI restriction site               | 4097-4104     |
| Poly A signal                       | 4249-4299     |

```

TAGTTATATA TAGTAATCAA TTACGGGGTC ATTAGTTCAT AGCCCATATA TGGAGTCCG
CGTTACATAA CTACGGTAA ATGGCCCGCC TGGCTGACCG CCCAACGACC CCCGCCATT
GACGTCAATA ATGACGTATG TTCCCATAGT AACGCCAATA GGGACTTTCC ATTGACGTCA
ATGGGTGGAG TATTTACGGT AAAGTGCCCA CTTGGCAGTA CATCAAGTGT ATCATATGCC
AAGTACGCC CCTATTGACG TCAATGACGG TAAATGGCCC GCCTGGCATT ATGCCAGTA
CATGACCTTA TGGACTTTC TCACTTGGCA GTACATCTAC GTATTAGTCA TCGCTATTAC
CATGGTGTATG CGGTTTTGGC AGTACATCAA TGGGCGTGGTA TAGCGGTTTG ACTCACGGGG
ATTTCCAAGT CTCCACCCA TTGACGTCAA TGGGAGTTTG TTTTGGCACC AAAATCAACG
GGACTTTCCA AAATGTCGTA ACAACTCCGC CCCATTGACG CAAATGGGCG GTAGGCGTGT
ACGGTGGGAG GTCTATATAA GCAGAGCTGG TTTAGTGAAC CGTCAGATCC GCTAGCGCTA
CCGACTCAG ATCTCGagct caccATGgac tgggtgacca aactcctgcc agccctgctg
ctgcagcatg tctcctctgca tctcctcctg ctccccatcg ccatccccta tgcagagggg
caaaggaaaa gaagaaatac aattcatgaa ttcaaaaaat cagcaaagac taccctaatac
aaaatagatc cagcactgaa gataaaaacc aaaaaagtga atactgcaga ccaatgtgct
aatagatgta ctaggaataa aggacttcca ttcacttgca aggcctttgt ttttgataaa
gaagaaaaac aatgcctctg gttccccttc aatagcatgt caagtggagt gaaaaaagaa
tttgccatg aatttgacct ctatgaaaac aaagactaca ttagaaactg catcattggt
aaaggacgca gctacaagg aacagtatct atcactaaga gtggcatcaa atgtcagccc
tggagttcca tgataaccaca cgaacacagc tttttgcctt cgagctatcg gggtaagac
ctacagggaaa actactgtcg aaatcctcga ggggaagaag ggggacctg gtgtttcaca
agcaatccag aggtacgcta cgaagtctgt gacattcctc agtgttcaga agtgaatgc

```

```

atgacctgca atggggagag ttatcgaggt ctcatggatc atacagaatc aggcaagatt
tgtcagcgct gggatcatca gacaccacac cggcacaatc tcttgccctga aagatatccc
gacaaggcct ttgatgataa ttatttgccgc aatcccgatg gccagccgag gccatggtgc
tatactcttg accctcacac ccgctgggag tactgtgcaa ttaaaacatg cgctgacaat
actatgaatg aactgatgt tcctttggaa acaactgaat gcatccaagg tcaaggagaa
ggctacaggg gcaactgtcaa taccatttgg aatggaattc catgtcagcg ttgggattct
cagtatcctc acgagcatga catgactcct gaaaatttca agtgcaagga cctacgagaa
aattactgcc gaaatccaga tgggtctgaa tcaccctggt gttttaccac tgatccaaac
atccgagttg gctactgctc ccaaattcca aactgtgata tgtcacatgg acaagattgt
tatcgtggga atggcaaaaa ttatatgggc aacttatccc aaacaagatc tggactaaca
tgttcaatgt gggacaagaa catggaagac ttacatogtc atatcttctg ggaaccagat
gcaagtaagc tgaatgagaa ttactgccga aatccagatg atgatgctca tggaccctgg
gctacacagg gaaatccact cattccttgg gattattgcc ctatttctcg ttgtgaaggt
gataccacac ctacaatagt caattta gaccatcccg taatatcttg tgccaaaacg
aaacaattgc gagttgtaaa tgggattcca acacgaacaa acataggatg gatggttagt
ttgagataca gaaataaaca tatctgcgga ggatcattga taaaggagag ttgggttctt
actgcacgac agtgtttccc ttctcgagac ttgaaagatt atgaaagcttg gcttgggaatt
catgatgtcc acggaagagg agatgagaaa tgcaaacaggt ttctcaatgt ttcccagctg
gtatatggcc ctgaaggatc agatctggtt ttaatgaagc ttgccaggcc tgetgtcctg
gatgattttg ttagtacgat tgatttacct aattatggat gcacaattcc tgaagagacc
agttgcagtg tttatggctg gggctacact ggattgatca actatgatgg cctattacga
gtggcacatc tctatataat gggaaatgag aaatgcagcc agcatcatcg agggaaggtg
actctgaatg agtctgaaat atgtgctggg gctgaaaaga ttggatcagg accatgtgag
ggggattatg gtggcccact tgtttgtgag caacataaaa tgagaatggt tcttgggtgc
attgttctcg gtcgtggatg tgccattcca aatcgtcctg gtatttttgt ccgagtagca
tattatgcaa aatggataca caaaattatt ttaacatata aggtaccaca gtcaTAgCCC
GGGATCCGCC CCTCTCCCTC CCCCCCCCCT AACGTTACTG GCCGAAGCCG CTTGGAATAA
GGCCGGTGTG CGTTTGTCTA TATGTTATTT TCCACCATAT TGCCGTCTTT TGGAATGTG
AGGGCCCGGA AACCTGGCCC TGTCTTCTTG ACGAGCATT CTAGGGGTCT TTCCCTCTC
GCCAAAGGAA TGCAAGGTCT GTTGAATGTC GTGAAGGAAG CAGTTCCTCT GGAAGCTTCT
TGAAGACAAA CAACGTCTGT AGCGACCTT TGCAGGCAGC GGAACCCCC ACCTGGCGAC
AGGTGCCTCT GCGGCCAAAA GCCACGTGTA TAAGATACAC CTGCAAAGGC GGCACAACCC
CAGTGCCACG TTGTGAGTTG GATAGTTGTG GAAAGAGTCA AATGGCTCTC CTC AAGCGTA
TTCAACAAGG GGCTGAAGGA TGCCAGAAAG GTACCCCAT TGTATGGGATC TGATCTGGGG
CCTCGGTGCA CATGCTTTAC ATGTGTTTAG TCGAGGTTAA AAAAAAGCTCT AGGCCCCCG
AACCACGGGG ACGTGGTTTT CCTTTGAAAA ACACGATGAT AATATGGCCA CatCCGGAAC
CA.TG GCCCTC TCCGAGGACG TCATCAAGGA GTTCATGCGC TTCAAGGTGC GCATGGAGGG
CTCCGTGAAC GGCCACGAGT TCGAGATCGA GGGCGAGGGC GAGGGCCGCC CCTACGAGGG
CACCCAGACC GCCAAGCTGA AGGTGACCAA GGGCGGCCCC CTGCCCTTCG CCTGGGACAT
CCTGTCCCC CAGTTCAGT ACGGCTCCAA GGTGTACGTG AAGCACCCCG CCGACATCCC
CGACTACAAG AAGCTGTCTT TCCCCGAGGG CTTCAGTGG GAGCGCGTGA TGAACTTCGA
GGACGGCGGC GTGGTGACC TGACCCAGGA CTCTCCCTG CAGGACGGCT CCTTCATCTA
CAAGGTGAAG TTCATCGGCG TGAACTTCCC CTCCGACGGC CCCGTAATGC AGAAGAAGAC
TATGGGCTGG GAGGCCTCCA CCGAGCGCCT GTACCCCGC GACGGCGTGC TGAAGGCGA
GATCCACAAG GCCCTGAAGC TGAAGGACGG CGGCCACTAC CTGGTGGAGT TCAAGTCCAT
CTACATGGCC AAGAAGCCCG TGCAGCTGCC CGGCTACTAC TACGTGGACT CCAAGCTGGA
CATCACCTCC CACAACGAGG ACTACACCAT CGTGGAGCAG TACGAGCGCG CCGAGGGCCG
CCACCACCTG TTCCTGTAGg cggccGCGAC TCTAGATCAT AATCAGCCAT ACCCATTTG
TAGAGGTTTT ACTTGCTTTA AAAAACTCC CACACCTCCC CCTGAACCTG AAACATAAAA
TGAATGCAAT TGTGTGTGTT AACTTGTTTA TTGCAGCTTA TAATGGTTAC AAATAAAGCA
ATAGCATCAC AAATTCACA AATAAAGCAT TTTTTTCACT GCATTCTAGT TGTGGTTTGT

```

NB: the 3 gaps in the middle of the HGF CDS above are where a stop codon can be inserted to convert this into NK4 (481 amino acids).



## 5. pCMV-NK4-IRES-DsRed

The CMV-NK4-IRES-DsRed plasmid was constructed by standard cloning methods, was verified by DNA sequencing, and contains the following features (see Key below). N.B. the fibronectin collagen binding domain coding sequence (CBD; Kitajima T., et al. *Biomaterials* **28**: 1989-1997, 2007) was cloned downstream of NK4. NK4 had similar repressor activity and diffusion profiles in the presence or absence of the CBD fusion (data not shown).

| Key                                     | Position (bp) |
|-----------------------------------------|---------------|
| CMV promoter                            | 1 – 589       |
| SacI restriction site                   | 616 – 621     |
| NK4 CDS with Kozak sequence (479 a.a.)  | 622 – 2061    |
| <u>FseI</u> restriction site (GGCCGGCC) | 2062 – 2069   |
| CBD                                     | 2070 – 2754   |
| Ascl                                    | 2755 – 2762   |
| IRES                                    | 2763 – 3347   |
| BspEI restriction site                  | 3348 – 3353   |
| DsRed CDS with Kozak sequence           | 3354 – 4036   |
| NotI restriction site                   | 4035 - 4042   |
| Poly A signal                           | 4187 – 4237   |

```

1 TAGTTATTAA TAGTAATCAA TTACGGGGTC ATTAGTTCAT AGCCCATATA TGGAGTTCGG
61 CGTTACATAA CTTACGGTAA ATGGCCCGCC TGGCTGACCG CCCAACGACC CCCGCCATT
121 GACGTCAATA ATGACGTATG TTCCCATAGT AACGCCAATA GGGACTTTC ATTGACGTCA
181 ATGGGTGGAG TATTTACGGT AAATGCCCA CTGGCAGTA CATCAAGTGT ATCATATGCC
241 AAGTACGCCC CCTATTGACG TCAATGACGG TAAATGGCCC GCCTGGCATT ATGCCAGTA
301 CATGACCTTA TGGGACTTTC CTACTTGGCA GTACATCTAC GTATTAGTCA TCGCTATTAC
361 CATGGTGTATG CGGTTTTGGC AGTACATCAA TGGGCGTGGG TAGCGGTTTG ACTCACGGGG
421 ATTTCCAAGT CTCCACCCCA TTGACGTCAA TGGGAGTTTG TTTTGGCACC AAAATCAACG
481 GGACTTTCCA AAATGTCGTA ACAACTCCGC CCCATTGACG CAAATGGGCG GTAGGCGTGT
541 ACGGTGGGAG GTCTATATAA GCAGAGCTGG TTTAGTGAAC CGTCAGATCC GCTAGCGCTA
601 CCGGACTCAG ATCTCGagct caccATGgac tgggtgacca aactcctgcc agccctgctg
661 ctgcagcatg tcctcctgca tctcctcctg ctccccatcg ccatccccta tgcagagggg
721 caaaggaaaa gaagaaatac aattcatgaa ttcaaaaaat cagcaaagac taccctaatac
781 aaaatagatc cagcactgaa gataaaaaacc aaaaaagtga atactgcaga ccaatgtgct
841 aatagatgta ctaggaataa aggacttcca ttcacttgca aggcttttgt ttttgataaa
901 gcaagaaaaa actactgtcg aaatccttca aatagcatgt caagtggagt gaaaaaagaa
961 tttggccatg aatttgacct ctatgaaaac aaagactaca ttagaaactg catcattggt
1021 aaaggacgca gctacaaggg aacagtatct atcactaaga gtggcatcaa atgtcagccc
1081 tggagttcca tgataccaca cgaacacagc tttttgcctt cgagctatcg gggtaagac
1141 ctacaggaaa actactgtcg aaatcctcga ggggaagaag ggggaccctg gtgtttcaca
1201 agcaatccag aggtacgcta cgaagtctgt gacattcctc agtggtcaga agttgaatgc
1261 atgacctgca atggggagag ttatcgaggt ctcatggatc atacagaatc aggcaagatt
1321 tgtcagcgct gggatcatca gacaccacac cggcacaat tcttgctgta aagatattcc
1381 gacaagggct ttgatgataa ttattgcccg aatcccgatg gccagccgag gccatggtgc
1441 tatactcttg accctcacac ccgctgggag tactgtgcaa ttaaaacatg cgctgacaat
1501 actatgaatg aactgatgt tcctttggaa acaactgaat gcatccaagg tcaaggagaa
1561 ggctacaggg gcactgtcaa taccatttgg aatggaattc catgtcagcg ttgggattct
1621 cagtatcctc acgagcatga catgactcct gaaaatttca agtgcaagga cctacagaaa
1681 aattactgcc gaaatccaga tgggtctgaa tcaccctggg gttttaccac tgatccaaac
1741 atccgagttg gctactgtct ccaaattcca aactgtgata tgtcacatgg acaagattgt

```

1801 tatcgtggga atggcaaaaa ttatatgggc aacttatccc aaacaagatc tggactaaca  
1861 tgttcaatgt gggacaagaa catggaagac ttacatcgtc atatcttctg ggaaccagat  
1921 gcaagtaagc tgaatgagaa ttactgccga aatccagatg atgatgctca tggaccctgg  
1981 tgctacacgg gaaatccact cattccttgg gattattgcc ctatttctcg ttgtgaaggt  
2041 gataccacac ctacaatagt cGGCCGGCCT ACCATGGCTG CCGTGTACCA GCCACAGCCT  
2101 CACCCACAGC CCCCTCCATA TGGGCATTGC GTGACTGACT CTGGAGTGGT GTACAGTGTG  
2161 GGCATGCAGT GGCTGAAGAC ACAGGGAAC AAACAGATGC TGTGCACTTG TCTGGGGAAT  
2221 GGAGTGTGAT GCCAGGAGAC AGCCGTGACT CAGACCTATG GCGGAAACAG CAATGGAGAA  
2281 CCCTGCGTGC TGCCTTTCAC TTACAACGGC CGGACCTTTT ATAGTTGCAC CACAGAGGGC  
2341 AGACAGGATG GGCACCTGTG GTGTAGCACT ACCTCCAATT ACGAACAGGA CCAGAAGTAT  
2401 TCCTTCTGCA CAGATCATAC TGTGCTGGTG CAGACCCGGG GAGGCAACTC TAATGGCGCC  
2461 CTGTGCCACT TCCATTTTCT GTACAACAAT CATAACTATA CCGACTGCAC ATCCGAGGGC  
2521 CGGAGAGATA ACATGAAGTG GTGTGGGACA ACTCAGAATT ATGACGCTGA TCAGAAATTC  
2581 GGCTTTTGGC CCATGGCCGC TCACGAGGAA ATCTGTACCA CAAACGAGGG CGTGATGTAC  
2641 AGGATTGGAG ACCAGTGGGA TAAGCAGCAC GACATGGGGC ATATGATGAG ATGTACCTGC  
2701 GTGGGAAATG GACGCGGAGA ATGGACATGT ATCGCTTACA GCCAGCTGCG CTAGGCGCGG  
2761 CCGCCCTCT CCCTCCCCC CCCCTAACGT TACTGGCCGA AGCCGCTTGG AATAAGGCCG  
2821 GTGTGCGTTF GTCTATATGT TATTTTCAC CATATTGCCG TCTTTTGGCA ATGTGAGGGC  
2881 CCGGAAACCT GGCCTGTCT TCTTGACGAG CATTCTAGG GGTCTTTCC CTCTCGCCAA  
2941 AGGAATGCAA GGTCTGTTGA ATGTCGTGAA GGAAGCAGTT CCTCTGGAAG CTTCTGAAG  
3001 ACAAAACAG TCTGTAGCGA CCCTTTCAG GCAGCGGAAC CCCCCACCTG GCGACAGGTG  
3061 CCTCTGCGGC CAAAAGCCAC GTGTATAAGA TACACCTGCA AAGGCGGCAC AACCCAGTG  
3121 CCACGTTGTG AGTTGGATAG TTGTGGAAG AGTCAAATGG CTCTCCTCAA GCGTATTCAA  
3181 CAAGGGGCTG AAGGATGCC AGAAGGTACC CCATTGTATG GGATCTGATC TGGGGCTCG  
3241 GTGCACATGC TTTACATGTG TTTAGTCGAG GTAAAAAAA CGTCTAGGCC CCCCAGACCA  
3301 CGGGGACGTG GTTTTCTTT GAAAAACAG ATGATAATAT GGCCACAACC GGAACCATCG  
3361 CCTCTCCGA GGACGTCATC AAGGAGTTCA TGGCTTCAA GGTGCGCATG GAGGGTCCG  
3421 TGAACGGCCA CGAGTTCGAG ATCGAGGGCG AGGGCGAGGG CCGCCCCTAC GAGGGCACCC  
3481 AGACCGCCAA GCTGAAGGTG ACCAAGGGCG GCCCCTGCC CTTCGCCTGG GACATCTGT  
3541 CCCCCAGTT CCAGTACGGC TCCAAGGTGT ACGTGAAGCA CCCC GCCGAC ATCCCCGACT  
3601 ACAAGAAGCT GTCCTTCCCC GAGGGCTTCA AGTGGGAGCG CGTGATGAAC TTCGAGGACG  
3661 GCGGCGTGGT GACCGTGACC CAGGACTCCT CCCTGCAGGA CGGCTCCTTC ATCTACAAGG  
3721 TGAAGTTCAT CGGCGTGAAC TTCCCCCTCG ACGGCCCGT AATGCAGAAG AAGACTATGG  
3781 GCTGGGAGGC CTCCACCGAG CGCCTGTACC CCCGCGACGG CGTGCTGAAG GCGGAGATCC  
3841 ACAAGGCCCT GAAGCTGAAG GACGCGGCC ACTACCTGGT GGAGTTC AAG TCCATCTACA  
3901 TGGCCAAGAA GCCCGTGCAG CTGCCCGGCT ACTACTACGT GGACTCCAAG CTGGACATCA  
3961 CCTCCACAA CGAGGACTAC ACCATCGTGG AGCAGTACGA GCGCGCCGAG GGCCGCCACC  
4021 ACCTGTTCCCT GTAGggggc GCGACTCTAG ATCATAATCA GCCATACCAC ATTTGTAGAG  
4081 GTTTTACTTG CTTTAAAAAA CCTCCCACAC CTCCCCCTGA ACCTGAAACA TAAAATGAAT  
4141 GCAATTGTTG TTGTAACTT GTTTATTGCA GCTTATAATG GTTACAAATA AAGCAATAGC  
4201 ATCACAAATT TCACAAATAA AGCATTTTT TCACTGCATT CTAGTTGTGG TTTGTCCAAA

## 6. Calculation of effective diffusion constants

HGF activation and NK4 repression of reporter cysts can be modeled by a set of reaction-diffusion equations:

$$\frac{\partial a(x, t)}{\partial t} = D_a \frac{\partial^2 a(x, t)}{\partial x^2} + J_a(x, t), \quad (1)$$

$$\frac{\partial h(x, t)}{\partial t} = D_h \frac{\partial^2 h(x, t)}{\partial x^2} + J_h(x, t), \quad (2)$$

$$\frac{\partial r(x, t)}{\partial t} = f(a(x, t - \tau_a), h(x, t - \tau_h)), \quad (3)$$

where  $a(x, t)$ ,  $h(x, t)$  and  $r(x, t)$  denote the activator, inhibitor and reporter concentrations at time  $t$  and position  $x$ , respectively.  $J_a(x, t)$  and  $J_h(x, t)$  are the source functions that describe both the rate and spatial distribution of activator and inhibitor production, respectively. All physical and chemical processes from the signal recognition, at the cell membrane, up to the reporter protein synthesis can be modeled by an effective regulatory function  $f$  with delays  $\tau_s$ . Thus,  $f$  describes the cyst responses at time  $t$  to a given signaling in the past (the activator at time  $t - \tau_a$  and inhibitor concentrations at time  $t - \tau_h$ ).

In order to estimate the parameters of the processes governing this system we will estimate the diffusion constant of HGF molecules from the distribution profile of fluorescence data in **Figure 6a**. The gradient of HGF-induced reporter protein  $r$  obtained in Fig. 6a can be modeled by the equation in 1-dimension:

$$\frac{\partial a}{\partial t} = D_a \frac{\partial^2 a}{\partial x^2} + J_a(x, t), \quad (4)$$

$$\frac{\partial r}{\partial t} = f(a(x, t - \tau_a), 0), \quad (5)$$

As the domain boundaries are far from the source, we can consider the following idealized condition: an unbounded domain where there exists a point source located at  $x = 0$  which releases molecules at a constant rate  $J$ . If the concentration is initially zero everywhere (with the exception of the source position), and the source is switched-on at  $t = 0$ , then the evolution of the resulting concentration distribution is given by:

$$a(x, t)/J = \frac{x}{4D_a\sqrt{\pi}} \int_0^{4D_at/x^2} \frac{e^{-1/u}}{\sqrt{u}} du. \quad (6)$$

This activator profile and a sigmoidal regulatory function  $f(a)$  allow us, by integrating Eq. 5, to determine the theoretical reporter profile  $r(x, t)$ , which is proportional to:

$$\int_0^t b + \frac{a(x, u)^n}{K_a^n + a(x, u)^n} du. \quad (7)$$

Even when there is not an analytic expression for the theoretical reporter profile, it is possible to find the parameter values of  $D_a$ ,  $K_a$ ,  $n$  and  $b$  that fit our experimentally observed GFP profile. A numerical fitting procedure determines the following values:  $D_a = 3.1 \times 10^{-3}$  mm<sup>2</sup>/min,  $K_a = 0.017$ ,  $n = 2.6$  and  $b = 0.02$ . **Figure S5** depicts the experimental and theoretical predicted diffusion profile of HGF-induced GFP. Similar analyses are carried out for the other gradient calculations in **Figure 6**.

## 7. Regulatory function calculation - HGF and NK4

### HGF

The HGF dose-response curve  $f$  can be obtained by considering the expression profile for different amounts of inducer HGF (Main text, Figure 3a). Each individual profile was normalized to the profile at 0 HGF and the maximum value of the relative fluorescence was taken (by fitting a 4th order polynomial; this corresponds to GFP output at approximately 24 h). We then calculated the average of these maximum values over four biological replicates and fitted a sigmoidal function (the black curve in Figure 3b):

$$V a^n / (K_d^n + a^n) + b$$

The variable  $a$  corresponds to HGF concentration (ng/ml), the parameter  $n$  is the Hill coefficient,  $k_d$  is the apparent dissociation constant for activator (equivalent to the effective concentration for 50% activation:  $EC_{50}$ ),  $V$  is the difference between the saturation or maximum relative response,  $R_{max}$ , and the baseline relative response,  $b$ , in the absence of HGF. Therefore, the maximum GFP fold-induction  $R_{max}$  is given by:

$$R_{max} = V + b$$

The fitting procedure leads to the following values:  $k_d = 17$  ng/ml,  $n = 1.22$ ,  $V = 3.33$  fold,  $b = 0.75$  fold and  $R_{max} = 4.08$  fold.

### NK4

We also quantified the response to the inhibitor NK4 (Main text, Figure 3d). Again, we took the maximum value of the relative fluorescence for each NK4 concentration, and then averaged over the two replicates obtained with 16.7 ng/ml of HGF. Then we fitted the function (the black curve in Figure 3d):

$$\frac{1 + (a/k_a)^n}{(1 + (a/k_a)^n + (h/k_h)^n)}$$

The variable  $h$  represents NK4 concentration and  $k_h$  is the apparent dissociation constant for NK4 (equivalent to the effective NK4 concentration for 50% inhibition:  $IC_{50}$ ). Using the values of  $k_a$  and  $n$  obtained above, and  $a = 16.7$  ng/ml, we obtain  $k_h = 37.6$  ng/ml.
